# Supplementary material
Source: PubMed Central journal article supplement (PMC7011195)
Supplement: DB181048SupplementaryData.pdf [file DB181048SupplementaryData.pdf]

SUPPLEMENTARY DATA

**Supplementary Table S1.** Number of participants with data on exposures, outcomes and covariates/potential confounders in UCLEB and Fenland studies used in the multivariable and Mendelian randomization analyses

| Trait                                               | Variable type*                 | Available studies                                  | Total N** |
|-----------------------------------------------------|--------------------------------|----------------------------------------------------|-----------|
| <b>ALT (U/L)</b>                                    | Exposure                       | BRHS, BWHHS, NSHD & Fenland                        | 15371     |
| <b>ALP (U/L)</b>                                    | Exposure                       | CAPS, NSHD & Fenland                               | 12761     |
| <b>AST (U/L)</b>                                    | Exposure                       | BRHS, BWHHS, CAPS & NSHD                           | 6624      |
| <b>GGT (U/L)</b>                                    | Exposure                       | BRHS, BWHHS, CAPS, EAS, NSHD & Fenland             | 17336     |
| <b>Fasting glucose (mmol/l)</b>                     | Continuous outcome             | BRHS, BWHHS, CAPS, EAS, ELSA, NSHD & WHII          | 9689      |
| <b>Fasting insulin (<math>\mu</math>U/ml)</b>       | Continuous outcome             | BRHS, BWHHS, CAPS, NSHD & WHII                     | 7024      |
| <b>LDL cholesterol (mmol/L)</b>                     | Continuous outcome             | BRHS, BWHHS, CAPS, EAS, ELSA, WHII, NSHD & Fenland | 21296     |
| <b>HDL cholesterol (mmol/L)</b>                     | Continuous outcome             | BRHS, BWHHS, CAPS, EAS, ELSA, WHII, NSHD & Fenland | 21464     |
| <b>Total cholesterol (mmol/L)</b>                   | Continuous outcome             | BRHS, BWHHS, CAPS, EAS, ELSA, WHII, NSHD & Fenland | 21639     |
| <b>Triglycerides (mmol/l)</b>                       | Continuous outcome             | BRHS, BWHHS CAPS, EAS, ELSA, WHII, NSHD & Fenland  | 20856     |
| <b>Type 2 diabetes cases</b>                        | Disease outcome                | BRHS, BWHHS, CAPS, EAS, ELSA, WHII, NSHD           | 1202      |
| <b>Type 2 diabetes controls</b>                     |                                |                                                    | 10588     |
| <b>Age (years)</b>                                  | Covariate/Potential Confounder | BRHS, BWHHS CAPS, EAS, ELSA, WHII, NSHD & Fenland  | 21772     |
| <b>BMI (<math>\text{kg/m}^2</math>)<sup>§</sup></b> | Potential confounder           | BRHS, BWHHS CAPS, EAS, ELSA, WHII, NSHD & Fenland  | 21513     |
| <b>Waist circumference (cm)<sup>§</sup></b>         | Potential confounder           | BRHS, BWHHS, ELSA, WHII, NSHD & Fenland            | 19595     |
| <b>Sex</b>                                          | Covariate/Potential confounder | BRHS, BWHHS CAPS, EAS, ELSA, WHII, NSHD & Fenland  | 21772     |
| <b>Smoking<sup>§</sup></b>                          | Potential confounder           | BRHS, BWHHS, CAPS, EAS, ELSA, WHII, NSHD & Fenland | 21631     |
| <b>Alcohol consumption<sup>§</sup></b>              | Potential confounder           | BRHS, BWHHS, CAPS, EAS, ELSA, WHII, NSHD & Fenland | 21501     |
| <b>Social class<sup>§</sup></b>                     | Potential confounder           | BRHS, BWHHS, CAPS, EAS, ELSA, NSHD & Fenland       | 8563      |

\*Variable types as used in the multivariable/Mendelian randomization study.

<sup>§</sup>Only the multivariable analyses were adjusted for these confounders.

\*\*Number of individuals with non-missing data for each trait in the analysis sample. For each UCLEB study, we included individuals who had complete data for all available genetic variants, age, sex, the liver function markers measured in the study, and were not on lipid lowering medication. For those studies that were only used to estimate the gene-outcome association (i.e.: studies where none of the liver function markers were available), we included individuals who had complete data for all available genetic variants, age and sex only.

ALT: alanine aminotransferase; ALP: alkaline phosphatase; AST: aspartate aminotransferase; GGT: gamma-glutamyl transferase; BMI: body mass index; UCLEB consortium: UCL-LSHTM-Edinburgh-Bristol consortium – BRHS: British Regional Heart Study; BWHHS: British Women’s Heart and Health Study; CaPS: Caerphilly Prospective Study; EAS: Edinburgh Artery Study; ELSA: English Longitudinal Study of Ageing; NSHD: MRC National Survey of Health and Development, WHII: Whitehall II study.

SUPPLEMENTARY DATA

**Supplementary Table S2a.** Distribution of participant characteristics (continuously measured variables) within each UCLEB study and the Fenland study

| Variable                                               | BRHS                           | BWHHS                       | CAPS                           | EAS                           | ELSA                           | WHII                           | NSHD                           | Fenland                       |
|--------------------------------------------------------|--------------------------------|-----------------------------|--------------------------------|-------------------------------|--------------------------------|--------------------------------|--------------------------------|-------------------------------|
| <b>N<sup>1</sup></b>                                   | 2090                           | 1733                        | 1221                           | 762                           | 1688                           | 2716                           | 1580                           | 9982                          |
| <b>Age (years)</b>                                     | 69.01 (5.66)                   | 71.55 (5.31)                | 56.74 (4.47)                   | 64.51 (5.64)                  | 73.93 (9.60)                   | 60.39 (5.91)                   | 53 (N/A)                       | 48.14 (7.44)                  |
| <b>BMI (kg/m<sup>2</sup>)<sup>2</sup></b>              | 26.48 (24.47, 28.83)<br>[2077] | 27 (24, 30)<br>[1714]       | 26.44 (24.40, 28.67)<br>[1202] | 25.21 (23.15, 27.40)<br>[762] | 26.91 (24.36, 29.96)<br>[1571] | 26.00 (23.80, 28.60)<br>[2708] | 26.32 (24.15, 29.34)<br>[1574] | 26.16 (29.31-23.56)<br>[9905] |
| <b>Waist circumference (cm)</b>                        | 96.71 (10.22)<br>[2071]        | 86.35 (12.28)<br>[1707]     | Not available                  | Not available                 | 95.91 (12.78)<br>[1627]        | 91.29 (12.18)<br>[2713]        | 90.48 (12.70)<br>[1578]        | 90.86 (13.43)<br>[9899]       |
| <b>Physical activity (m/s<sup>2</sup>)<sup>3</sup></b> | Not available                  | Not available               | Not available                  | Not available                 | Not available                  | Not available                  | Not available                  | 0.11 (0.09, 0.15)             |
| <b>ALT (U/L)<sup>2</sup></b>                           | 15 (12, 20)                    | 12 (9, 15)                  | Not available                  | Not available                 | Not available                  | Not available                  | 26 (21, 34)                    | 25 (19, 34)<br>[9968]         |
| <b>ALP (U/L)<sup>2</sup></b>                           | Not available                  | Not available               | 89 (75, 105)                   | Not available                 | Not available                  | Not available                  | 79 (67, 94)                    | 83 (69, 98)<br>[9960]         |
| <b>AST (U/L)<sup>2</sup></b>                           | 23 (19, 27)                    | 22 (19, 25)                 | 19 (16, 23)                    | Not available                 | Not available                  | Not available                  | 24 (21, 29)                    | Not available                 |
| <b>GGT (U/L)<sup>2</sup></b>                           | 26 (19, 38)                    | 20 (14, 31)                 | 30 (22, 44)                    | 22.50 (16.13, 33.29)          | Not available                  | Not available                  | 29.6 (21.6, 42.3)              | 26 (20, 38)<br>[9950]         |
| <b>Fasting glucose (mmol/L)<sup>2,4</sup></b>          | 5.30 (0.65)<br>[1820]          | 5.70 (0.50)<br>[1498]       | 5.10 (0.49)<br>[1055]          | 5.52 (0.55)<br>[685]          | 4.90 (0.49)<br>[702]           | 5.26 (0.49)<br>[2509]          | 5.48 (0.56)<br>[1420]          | Not available                 |
| <b>Fasting insulin (µU/ml)<sup>2,4</sup></b>           | 7.70 (5.20, 11.30)<br>[1813]   | 6.10 (4.40, 9.20)<br>[1498] | 4.82 (3.17, 7.10)<br>[535]     | Not available                 | Not available                  | 6.7 (4.6, 10.1)<br>[2438]      | 42 (28, 60)<br>[740]           | Not available                 |
| <b>LDL cholesterol (mmol/L)</b>                        | 3.96 (0.98)<br>[2060]          | 4.25 (1.07)<br>[1687]       | 3.72 (0.88)<br>[1178]          | 5.35 (1.24)<br>[759]          | 3.49 (1.05)<br>[1645]          | 3.62 (0.87)<br>[2683]          | 3.53 (0.94)<br>[1374]          | 3.43 (0.90)<br>[9910]         |
| <b>HDL cholesterol (mmol/L)</b>                        | 1.15 (0.25)<br>[2004]          | 1.62 (0.45)<br>[1731]       | 1.02 (0.25)<br>[1214]          | 1.45 (0.37)<br>[759]          | 1.50 (0.39)<br>[1677]          | 1.57 (0.45)<br>[2715]          | 1.70 (0.51)<br>[1382]          | 1.53 (0.41)                   |
| <b>Total cholesterol (mmol/L)</b>                      | 6.29 (0.99)<br>[2082]          | 6.73 (1.20)<br>[1733]       | 5.60 (0.99)<br>[1214]          | 7.10 (1.33)<br>[762]          | 5.79 (1.27)<br>[1678]          | 5.80 (0.95)<br>[2715]          | 6.10 (1.03)<br>[1473]          | 5.45 (1.02)                   |
| <b>Triglycerides (mmol/L)<sup>2</sup></b>              | 1.71 (1.2, 2.48)<br>[1302]     | 1.62 (1.21, 2.30)<br>[1733] | 1.64 (1.18, 2.34)<br>[1214]    | 1.35 (1.01, 1.78)<br>[762]    | 1.50 (1.1, 2.2)<br>[1678]      | 1.10 (0.80, 1.60)<br>[2715]    | 1.7 (1.2, 2.5)<br>[1470]       | 1.0 (0.7, 1.4)                |

<sup>1</sup> Number of individuals in the analysis sample of the Mendelian randomization study. The analysis sample for each UCLEB study included individuals who had complete data for all available SNPs, age, sex, the liver function markers measured in the study, and were not on lipid lowering medication. Note that the analysis sample in UCLEB was not defined based on the availability of complete data for the potential confounders and the outcome variables. Therefore, the number of individuals included in analyses involving the confounders and the outcome variables depends on the number of individuals with non-missing data for each outcome /confounder variable in a given study and is given in brackets if it differed from the N in the analysis sample. Analysis

## SUPPLEMENTARY DATA

sample in the Fenland study included individuals who were not on lipid lowering medication and had complete data on age, sex and at least 80% of the SNPs available.

<sup>2</sup> Distributions for these variables are median (interquartile range; IQR) because the distributions were right skewed; all other results are means (standard deviation; SD).

<sup>3</sup> Physical activity was assessed as average acceleration trunk longitudinal axis (m/s<sup>2</sup>).

<sup>4</sup> For fasting glucose and fasting insulin we removed individuals with type 2 diabetes and/or fasting glucose values  $\geq 7.0$  mol/L and/or individuals who were taking glucose lowering drugs.

ALT: alanine aminotransferase; ALP: alkaline phosphatase; AST: aspartate aminotransferase; GGT: gamma-glutamyl transferase BMI: body mass index; UCLEB consortium: UCL-LSHTM-Edinburgh-Bristol consortium – BRHS: British Regional Heart Study; BWHHS: British Women's Heart and Health Study; CaPS: Caerphilly Prospective Study; EAS: Edinburgh Artery Study; ELSA: English Longitudinal Study of Ageing; NSHD: MRC National Survey of Health and Development, WHII: Whitehall II study; HDL-C: high density lipoprotein-cholesterol; LDL-C: low density lipoprotein-cholesterol

SUPPLEMENTARY DATA

**Supplementary Table S2b.** Distribution of participant characteristics (categorical variables) within each UCLEB study and the Fenland study

| Variable                   | BRHS                              | BWHHS | CaPS | EAS  | ELSA | WHII | NSHD          | Fenland |               |
|----------------------------|-----------------------------------|-------|------|------|------|------|---------------|---------|---------------|
| <b>N*</b>                  | 2090                              | 1733  | 1221 | 762  | 1688 | 2716 | 1580          | 9982    |               |
| <b>Sex</b>                 | Men                               | 2090  | 0    | 1221 | 369  | 882  | 2073          | 747     | 4606          |
|                            | Women                             | 0     | 1733 | 0    | 393  | 806  | 643           | 833     | 5376          |
|                            | Missing <sup>a</sup>              | 0     | 0    | 0    | 0    | 0    | 0             | 0       | 0             |
| <b>Smoking</b>             | Never smokers                     | 585   | 933  | 240  | 292  | 573  | 1345          | 472     | 5329          |
|                            | Ever smokers                      | 1503  | 800  | 978  | 456  | 1115 | 1368          | 1033    | 4609          |
|                            | Missing <sup>a</sup>              | 2     | 0    | 3    | 14   | 0    | 3             | 75      | 44            |
| <b>Alcohol consumption</b> | Never                             | 78    | 306  | 70   | 83   | 173  | 67            | 309     | 1556          |
|                            | Ever                              | 1953  | 1258 | 1147 | 679  | 1515 | 2623          | 1271    | 8413          |
|                            | Missing                           | 59    | 169  | 4    | 0    | 0    | 26            | 0       | 13            |
| <b>Social class</b>        | Unskilled                         | 62    | 135  | 59   | 25   | 344  |               | 52      |               |
|                            | Semi-skilled                      | 168   | 171  | 224  | 56   | 325  |               | 147     |               |
|                            | Manual skilled                    | 850   | 432  | 707  | 187  | 350  |               | 232     |               |
|                            | Non-manual skilled                | 192   | 214  | 173  | 139  | 365  | Not available | 359     | Not available |
|                            | Managerial and lower professional | 567   | 282  | 57   | 263  | 290  |               | 619     |               |
|                            | Professional                      | 191   | 124  | 0    | 88   | 0    |               | 114     |               |
|                            | Missing                           | 60    | 375  | 1    | 4    | 14   | N/A           | 57      | N/A           |
| <b>Type 2 Diabetes</b>     | Yes                               | 251   | 230  | 149  | 76   | 210  | 159           | 127     | Not available |
|                            | No                                | 1839  | 1503 | 1072 | 686  | 1478 | 2557          | 1453    |               |
|                            | Missing                           | 0     | 0    | 0    | 0    | 0    | 0             | 0       | N/A           |

\* Number of individuals in the analysis sample of the Mendelian randomization study. The analysis sample for each study included individuals who had complete data for all available SNPs, age, sex, the liver function markers measured in the study, and were not on lipid lowering medication. N/A: not applicable. UCLEB consortium: UCL-LSHTM-Edinburgh-Bristol consortium – BRHS: British Regional Heart Study; BWHHS: British Women’s Heart and Health Study; CaPS: Caerphilly Prospective Study; EAS: Edinburgh Artery Study; ELSA: English Longitudinal Study of Ageing; NSHD: MRC National Survey of Health and Development, WHII: Whitehall II study.

SUPPLEMENTARY DATA

**Supplementary Table S3.** List of index SNPs associated with ALT, AST, ALP and GGT at genome-wide levels of significance ( $P < 5 \times 10^{-8}$ ) selected from published GWAS studies<sup>1</sup>

| Index SNP from GWAS | Associated liver function marker | Chr | Mapped gene/s <sup>2</sup>    | Publication Index SNP selected from | Index SNP in all relevant UCLEB studies | Genotyped/imputed in UCLEB studies | Index SNP in Fenland study | Genotyped/imputed in Fenland | Proxy SNP used if applicable                          | R <sup>2</sup> of proxy with index SNP |
|---------------------|----------------------------------|-----|-------------------------------|-------------------------------------|-----------------------------------------|------------------------------------|----------------------------|------------------------------|-------------------------------------------------------|----------------------------------------|
| s6834314            | ALT                              | 4   | <i>HSD17B13, MAPK10</i>       | Chambers et al_2011                 | Yes                                     | imputed                            | Yes                        | imputed                      | N/A                                                   | N/A                                    |
| s2954021            | ALP/ALT                          | 8   | <i>TRIB1</i>                  | Chambers et al_2011                 | Yes                                     | imputed                            | Yes                        | imputed                      | N/A                                                   | N/A                                    |
| s11597390           | ALT                              | 10  | <i>CPN1</i>                   | Yuan et al_2008                     | Yes                                     | genotyped                          | Yes                        | genotyped                    | N/A                                                   | N/A                                    |
| s2143571            | ALT                              | 22  | <i>SAMM50</i>                 | Yuan et al_2008                     | Yes                                     | imputed                            | Yes                        | genotyped                    | N/A                                                   | N/A                                    |
| s17109512           | AST                              | 10  | <i>GOT1</i>                   | Shen et al_2011                     | Yes except in CAPS and EAS <sup>3</sup> | imputed                            | Yes                        | genotyped                    | rs7073497                                             | 1.00                                   |
| s738407             | AST                              | 22  | <i>PNPLA3</i>                 | Novel                               | Yes                                     | imputed                            | Yes                        | imputed                      | N/A                                                   | N/A                                    |
| s738408             | AST                              | 22  | <i>PNPLA3</i>                 | Novel                               | Yes                                     | imputed                            | Yes                        | imputed                      | N/A                                                   | N/A                                    |
| s1780324            | ALP                              | 1   | <i>NBPF3-ALPL</i>             | Yuan et al_2008                     | Yes                                     | genotyped                          | Yes                        | genotyped                    | N/A                                                   | N/A                                    |
| s16856332           | ALP                              | 2   | <i>ABCB11</i>                 | Chambers et al_2011                 | No                                      | N/A                                | Yes                        | genotyped                    | rs11892966                                            | 1.00                                   |
| s9467160            | ALP                              | 6   | <i>GPLD1</i>                  | Yuan et al_2008                     | Yes                                     | imputed                            | Yes                        | genotyped                    | N/A                                                   | N/A                                    |
| s6984305            | ALP                              | 8   | <i>PPP1R3B</i>                | Chambers et al_2011                 | Yes                                     | genotyped                          | Yes                        | genotyped                    | N/A                                                   | N/A                                    |
| s514708             | ALP                              | 9   | <i>ABO</i>                    | Yuan et al_2008                     | Yes                                     | genotyped                          | No                         | N/A                          | rs8176714                                             | 1.00                                   |
| s10819937           | ALP                              | 9   | <i>ALDOB, C9orf125</i>        | Chambers et al_2011                 | No                                      | N/A                                | Yes                        | genotyped                    | No suitable proxy SNP (R <sup>2</sup> ≥ 0.8) in UCLEB | N/A                                    |
| s579459             | ALP                              | 9   | <i>ABO</i>                    | Chambers et al_2011                 | Yes                                     | genotyped                          | Yes                        | genotyped                    | N/A                                                   | N/A                                    |
| s7923609            | ALP                              | 10  | <i>JMJD1C, NRBF2</i>          | Chambers et al_2011                 | Yes                                     | genotyped                          | Yes                        | genotyped                    | N/A                                                   | N/A                                    |
| s174601             | ALP                              | 11  | <i>C11orf10, FADS1, FADS2</i> | Chambers et al_2011                 | Yes                                     | genotyped                          | Yes                        | genotyped                    | N/A                                                   | N/A                                    |
| s2236653            | ALP                              | 11  | <i>ST3GAL4</i>                | Chambers et al_2011                 | Yes                                     | imputed                            | Yes                        | imputed                      | N/A                                                   | N/A                                    |
| s7186908            | ALP                              | 16  | <i>HPR, PMFBP1</i>            | Chambers et al_2011                 | Yes                                     | imputed                            | Yes                        | imputed                      | N/A                                                   | N/A                                    |
| s314253             | ALP                              | 17  | <i>ASGR1, DLG4</i>            | Chambers et al_2011                 | Yes                                     | genotyped                          | Yes                        | genotyped                    | N/A                                                   | N/A                                    |
| s281377             | ALP                              | 19  | <i>FUT2</i>                   | Chambers et al_2011                 | Yes                                     | imputed                            | Yes                        | genotyped                    | N/A                                                   | N/A                                    |
| s7267979            | ALP                              | 20  | <i>ABHD12, GINS1, PYGB</i>    | Chambers et al_2011                 | Yes                                     | genotyped                          | Yes                        | genotyped                    | N/A                                                   | N/A                                    |
| s1497406            | GGT                              | 1   | <i>RSG1, EPHA2</i>            | Chambers et al_2011                 | Yes                                     | imputed                            | Yes                        | genotyped                    | N/A                                                   | N/A                                    |
| s12145922           | GGT                              | 1   | <i>CCBL2, PKN2</i>            | Chambers et al_2011                 | Yes                                     | imputed                            | Yes                        | genotyped                    | N/A                                                   | N/A                                    |
| s1335645            | GGT                              | 1   | <i>CEPT1, DENND1</i>          | Chambers et al_2011                 | No                                      | N/A                                | Yes                        | genotyped                    | No suitable proxy SNP (R <sup>2</sup> ≥ 0.8) in UCLEB | N/A                                    |
| s10908458           | GGT                              | 1   | <i>DPM3, EFNA1, PKLR</i>      | Chambers et al_2011                 | Yes                                     | imputed                            | Yes                        | imputed                      | N/A                                                   | N/A                                    |
| s1260326            | GGT                              | 2   | <i>C2orf16, GCKR</i>          | Chambers et al_2011                 | Yes                                     | genotyped                          | Yes                        | genotyped                    | N/A                                                   | N/A                                    |
| s13030978           | GGT                              | 2   | <i>MYO1B, STAT4</i>           | Chambers et al_2011                 | Yes                                     | imputed                            | Yes                        | genotyped                    | N/A                                                   | N/A                                    |
| s2140773            | GGT                              | 2   | <i>EFHD1, LOC100129166</i>    | Chambers et al_2011                 | Yes except in the EAS <sup>4</sup>      | genotyped                          | Yes                        | genotyped                    | No suitable proxy SNP (R <sup>2</sup> ≥ 0.8) in EAS   | N/A                                    |
| s10513686           | GGT                              | 3   | <i>SLC2A2</i>                 | Chambers et al_2011                 | Yes                                     | genotyped                          | Yes                        | genotyped                    | N/A                                                   | N/A                                    |
| s34547811           | GGT                              | 4   | <i>ZNF827</i>                 | Chambers et al_2011                 | Yes                                     | imputed                            | Yes                        | genotyped                    | N/A                                                   | N/A                                    |
| s6888304            | GGT                              | 5   | <i>CDH6</i>                   | Chambers et al_2011                 | No                                      | N/A                                | Yes                        | genotyped                    | No suitable proxy SNP (R <sup>2</sup> ≥ 0.8) in UCLEB | N/A                                    |
| s4074793            | GGT                              | 5   | <i>ITGA1</i>                  | Chambers et al_2011                 | Yes                                     | imputed                            | Yes                        | genotyped                    | N/A                                                   | N/A                                    |
| s9296736            | GGT                              | 6   | <i>MLIP</i>                   | Chambers et al_2011                 | Yes                                     | genotyped                          | Yes                        | imputed                      | N/A                                                   | N/A                                    |
| s17145750           | GGT                              | 7   | <i>MLXIPL</i>                 | Chambers et al_2011                 | Yes                                     | genotyped                          | Yes                        | genotyped                    | N/A                                                   | N/A                                    |

SUPPLEMENTARY DATA

|           |     |    |                                      |                     |                                                |           |     |           |                                                             |      |
|-----------|-----|----|--------------------------------------|---------------------|------------------------------------------------|-----------|-----|-----------|-------------------------------------------------------------|------|
| s754466   | GGT | 10 | <i>DLG5</i>                          | Chambers et al_2011 | No                                             | N/A       | Yes | imputed   | No suitable proxy SNP ( $R^2 \geq 0.8$ ) in UCLEB           | N/A  |
| s7310409  | GGT | 12 | <i>HNF1A, C12orf7</i>                | Chambers et al_2011 | Yes                                            | genotyped | Yes | genotyped | N/A                                                         | N/A  |
| s944002   | GGT | 14 | <i>C14orf73</i>                      | Chambers et al_2011 | Yes                                            | imputed   | Yes | genotyped | N/A                                                         | N/A  |
| s339969   | GGT | 15 | <i>RORA</i>                          | Chambers et al_2011 | Yes                                            | imputed   | Yes | genotyped | N/A                                                         | N/A  |
| s8038465  | GGT | 15 | <i>CD276</i>                         | Chambers et al_2011 | No except in the BRHS study <sup>5</sup>       | imputed   | Yes | genotyped | rs62004612                                                  | 0.87 |
| s4581712  | GGT | 16 | <i>DYNLRB2</i>                       | Chambers et al_2011 | Yes except in BWHHS, EAS and CAPS <sup>6</sup> | imputed   | Yes | genotyped | No suitable proxy SNP present in BWHHS, EAS and CAPS stuies | N/A  |
| s9913711  | GGT | 17 | <i>FLJ37644, SOX9</i>                | Chambers et al_2011 | No                                             | N/A       | Yes | genotyped | No suitable proxy SNP ( $R^2 \geq 0.8$ ) in UCLEB           | N/A  |
| s12968116 | GGT | 18 | <i>ATP8B1</i>                        | Chambers et al_2011 | No                                             | N/A       | Yes | genotyped | No suitable proxy SNP ( $R^2 \geq 0.8$ ) in UCLEB           | N/A  |
| s4503880  | GGT | 18 | <i>NEDD4L</i>                        | Chambers et al_2011 | No                                             | N/A       | Yes | imputed   | No suitable proxy SNP ( $R^2 \geq 0.8$ ) in UCLEB           | N/A  |
| s516246   | GGT | 19 | <i>FUT2</i>                          | Chambers et al_2011 | Yes                                            | genotyped | Yes | genotyped | N/A                                                         | N/A  |
| s4820599  | GGT | 22 | <i>GGT1</i>                          | Yuan et al_2008     | Yes                                            | genotyped | Yes | genotyped | N/A                                                         | N/A  |
| s1076540  | GGT | 22 | <i>MICAL3</i>                        | Chambers et al_2011 | Yes                                            | imputed   | Yes | genotyped | N/A                                                         | N/A  |
| s2739330  | GGT | 22 | <i>DDT, DDTL, GSTT1, GSTT2B, MIF</i> | Chambers et al_2011 | Yes                                            | imputed   | Yes | imputed   | N/A                                                         | N/A  |

<sup>1</sup> SNPs mapped to the same gene, as reported in the original GWAS publications, were considered as part of the same locus. For loci where the index SNP reported for the same locus was different in independent publications, we selected the SNP that was genotyped in the UCLEB studies. If the different index SNPs reported in independent publications for the same locus were all imputed or genotyped in UCLEB, we selected the one that showed the strongest association in the largest GWAS study. We used a proxy SNP ( $R^2 \geq 0.8$ ) if the index SNP was not present across all or some of relevant the UCLEB studies. If there was more than one eligible proxy, we selected the proxy that was genotyped in the UCLEB studies, and if all eligible proxies were genotyped or imputed we selected a proxy SNP in random. There were seven index SNPs in total (one SNP associated with ALP and six SNPs associated with GGT) that were not genotyped/imputed in any of the UCLEB studies, and did not have a suitable proxy available. These SNPs were therefore not included as genetic instruments in the UCLEB studies. However, all SNPs (or a suitable proxy) associated with a given liver function marker were available in the GWAS and Fenland studies, and were used as genetic instruments in those studies. One further GWAS has been published since we completed our search (July 2017), which found a novel rare variant associated with ALT (rs28929474; MAF=2%). Given that this variant is rare and is not available in T2D GWAS, which is the largest dataset contributing to the MR estimates, we have not included it in our analyses as it would add little information.

<sup>2</sup> Mapped gene for each SNP is given as reported in the original publication.

<sup>3</sup> Index SNP was absent in CAPS and EAS studies therefore we used the SNP rs7073497 in UCLEB studies, which is perfectly correlated with the index SNP and was available across all UCLEB studies.

<sup>4</sup> This SNP was not present in EAS study and there was no suitable proxy SNP present across all studies. Therefore, we did not use the EAS study to estimate the SNP-exposure and SNP-outcome for this locus.

<sup>5</sup> This SNP was used instead of the index SNP as it was present across all the relevant UCLEB studies and is correlated at  $R^2=0.87$  with the

## SUPPLEMENTARY DATA

index SNP.

<sup>6</sup> This SNP was absent in BWHHS, EAS and CAPS and there was no suitable proxy that was available across all studies. Therefore, we did not use the BWHHS, EAS and the CAPS study to estimate the SNP-exposure and SNP-outcome for this locus.

ALT: alanine aminotransferase; ALP: alkaline phosphatase; AST: aspartate aminotransferase; GGT: gamma-glutamyl transferase; SNPs: single nucleotide polymorphisms; UCLEB consortium: UCL-LSHTM-Edinburgh-Bristol consortium; GWAS: Genome-wide association study

SUPPLEMENTARY DATA

**Supplementary Table S4.** Association of novel variants with AST plasma concentration in the replication sample (NFBC1966 and NSHD studies)

| SNP      | Study          | N           | Effect size (SD units) | SE           | P-value      | MAF  |
|----------|----------------|-------------|------------------------|--------------|--------------|------|
| rs738407 | NFBC1966       | 3614        | 0.043                  | 0.022        | 0.049        | 0.48 |
| rs738407 | NSHD           | 1580        | 0.088                  | 0.057        | 0.120        | 0.34 |
|          | <b>Overall</b> | <b>5194</b> | <b>0.049</b>           | <b>0.020</b> | <b>0.017</b> |      |
| rs738408 | NFBC1966       | 3614        | 0.071                  | 0.026        | 0.006        | 0.23 |
| rs738408 | NSHD           | 1580        | 0.087                  | 0.050        | 0.080        | 0.16 |
|          | <b>Overall</b> | <b>5194</b> | <b>0.075</b>           | <b>0.023</b> | <b>0.001</b> |      |

The genome-wide association analyses were carried out in each individual study (BRHS, BWHHS, CaPS, EAS, and ET2DS) using the SnpStats software in R. The individual study estimates were combined using the inverse variance- fixed effect meta-analysis using the METAL software. Monomorphic SNPs, SNPs that were not sufficiently well imputed ( $R_{sq} < 0.3$ ), and SNPs with  $MAF < 0.001$  were filtered out prior to meta-analyses. Genome-wide significance was inferred at  $p < 5 \times 10^{-8}$ . Two novel variants (rs738407 and rs738408) near *PNPLA3* gene were associated with AST at genome-wide levels of significance ( $P < 5 \times 10^{-8}$ ) in the discovery stage and were replicated in the MRC NSHD study ( $n = 1,580$ ) (1) and 1966 Northern Finland Cohort (NFBC1966) ( $n = 3,614$ ) (2). AST: aspartate aminotransferase; BRHS: British Regional Heart Study; BWHHS: British Women's Heart and Health Study; CaPS: Caerphilly Prospective Study; EAS: Edinburgh Artery Study; ET2DS: Edinburgh Type 2 Diabetes Study; MAF: minor allele frequency; NSHD: MRC National Survey of Health and Development; NFBC1966: Northern Finland Birth Cohort 1966; SD: standard deviation; SNP: single nucleotide polymorphism; UCLEB consortium: UCL-LSHTM-Edinburgh-Bristol consortium.



SUPPLEMENTARY DATA

**Supplementary Table S5.** The associations of individual SNPs (used as genetic instruments for type 2 diabetes risk in Mendelian randomization analyses) with type 2 diabetes

| SNP        | Effect allele | Other allele | Beta   | SE    | P-value |
|------------|---------------|--------------|--------|-------|---------|
| rs2296173  | G             | A            | 0.065  | 0.009 | 7.7E-14 |
| rs12088739 | G             | A            | -0.088 | 0.013 | 9.8E-12 |
| rs1127655  | C             | T            | 0.044  | 0.008 | 2.5E-08 |
| rs2493394  | G             | A            | 0.073  | 0.011 | 1.2E-10 |
| rs340874   | T             | C            | -0.063 | 0.007 | 8.4E-18 |
| rs2820426  | A             | G            | -0.052 | 0.007 | 1.3E-12 |
| rs348330   | G             | A            | 0.049  | 0.008 | 1.9E-09 |
| rs2867125  | T             | C            | -0.060 | 0.010 | 4.3E-10 |
| rs780094   | T             | C            | -0.069 | 0.007 | 5.2E-21 |
| rs17334919 | T             | C            | -0.140 | 0.013 | 6.7E-28 |
| rs243019   | C             | T            | 0.057  | 0.007 | 2.3E-15 |
| rs1009358  | C             | T            | -0.055 | 0.008 | 9.8E-12 |
| rs10169613 | T             | C            | -0.043 | 0.008 | 3.6E-08 |
| rs12617659 | T             | C            | -0.069 | 0.010 | 2.8E-11 |
| rs7572970  | A             | G            | -0.059 | 0.009 | 1.4E-11 |
| rs13389219 | T             | C            | -0.072 | 0.007 | 2.1E-22 |
| rs2972144  | A             | G            | -0.091 | 0.008 | 2.6E-34 |
| rs7561798  | G             | A            | 0.040  | 0.007 | 2.8E-08 |
| rs1899951  | T             | C            | -0.112 | 0.011 | 1.6E-24 |
| rs1496653  | G             | A            | -0.077 | 0.009 | 2.6E-18 |
| rs11926707 | T             | C            | -0.046 | 0.008 | 1.7E-08 |
| rs2292662  | T             | C            | -0.063 | 0.011 | 1.2E-08 |
| rs6795735  | T             | C            | -0.056 | 0.007 | 1.6E-14 |
| rs11708067 | G             | A            | -0.097 | 0.009 | 5.9E-29 |
| rs9844972  | C             | G            | 0.096  | 0.015 | 1.0E-10 |
| rs4472028  | T             | C            | 0.045  | 0.007 | 2.1E-10 |
| rs11925227 | A             | G            | -0.053 | 0.010 | 2.3E-08 |
| rs7651090  | G             | A            | 0.120  | 0.008 | 3.9E-57 |
| rs3887925  | C             | T            | -0.047 | 0.008 | 2.5E-09 |
| rs6808574  | T             | C            | -0.055 | 0.008 | 4.4E-13 |

SUPPLEMENTARY DATA

|            |   |   |        |       |         |
|------------|---|---|--------|-------|---------|
| rs1801214  | C | T | -0.090 | 0.007 | 5.5E-34 |
| rs17086692 | T | G | -0.047 | 0.008 | 2.5E-08 |
| rs993380   | A | G | 0.051  | 0.008 | 4.6E-10 |
| rs7674212  | T | G | -0.047 | 0.008 | 6.2E-10 |
| rs11098676 | T | C | -0.054 | 0.010 | 2.0E-08 |
| rs7685296  | T | C | -0.051 | 0.008 | 2.3E-10 |
| rs735949   | C | T | -0.071 | 0.011 | 1.9E-11 |
| rs1061813  | G | A | 0.043  | 0.007 | 3.4E-09 |
| rs4865796  | G | A | -0.053 | 0.008 | 1.3E-11 |
| rs459193   | A | G | -0.071 | 0.008 | 8.8E-18 |
| rs3900856  | A | G | 0.114  | 0.019 | 7.4E-10 |
| rs2307111  | C | T | -0.041 | 0.007 | 3.0E-08 |
| rs7729395  | T | C | 0.137  | 0.016 | 1.1E-17 |
| rs10077431 | A | C | -0.049 | 0.009 | 4.8E-08 |
| rs1050226  | G | A | -0.049 | 0.007 | 3.3E-11 |
| rs7756992  | G | A | 0.130  | 0.008 | 6.0E-62 |
| rs2857605  | C | T | -0.067 | 0.009 | 5.9E-14 |
| rs2071479  | T | C | 0.147  | 0.023 | 6.6E-11 |
| rs9369425  | G | A | 0.055  | 0.009 | 1.1E-10 |
| rs72892910 | T | G | 0.065  | 0.010 | 6.4E-11 |
| rs853974   | T | C | 0.060  | 0.009 | 7.9E-12 |
| rs2246012  | C | T | 0.053  | 0.009 | 2.4E-08 |
| rs622217   | C | T | -0.049 | 0.008 | 3.1E-10 |
| rs17168486 | T | C | 0.074  | 0.009 | 2.2E-15 |
| rs2191348  | G | T | -0.065 | 0.007 | 3.4E-19 |
| rs849135   | G | A | 0.100  | 0.007 | 1.0E-43 |
| rs2908282  | A | G | 0.055  | 0.009 | 4.3E-09 |
| rs2299383  | T | C | 0.041  | 0.007 | 1.5E-08 |
| rs13239186 | T | C | 0.054  | 0.009 | 2.7E-10 |
| rs13234269 | A | T | -0.058 | 0.008 | 7.0E-14 |
| rs7786095  | G | A | -0.074 | 0.013 | 9.6E-09 |
| rs7841082  | T | C | -0.042 | 0.008 | 4.9E-08 |
| rs11774915 | T | C | 0.050  | 0.009 | 8.7E-09 |
| rs10100265 | A | C | 0.049  | 0.008 | 6.3E-10 |
| rs17411031 | G | C | -0.045 | 0.008 | 3.0E-08 |

SUPPLEMENTARY DATA

|            |   |   |        |       |          |
|------------|---|---|--------|-------|----------|
| rs10087241 | G | A | 0.048  | 0.008 | 2.8E-09  |
| rs12681990 | C | T | 0.063  | 0.010 | 3.6E-11  |
| rs516946   | T | C | -0.082 | 0.009 | 3.2E-22  |
| rs7845219  | C | T | -0.042 | 0.007 | 4.5E-09  |
| rs3802177  | A | G | -0.122 | 0.008 | 2.3E-52  |
| rs2294120  | G | A | -0.044 | 0.008 | 1.6E-08  |
| rs10974438 | C | A | 0.059  | 0.008 | 3.0E-15  |
| rs1063192  | G | A | -0.063 | 0.007 | 3.3E-18  |
| rs10811661 | C | T | -0.157 | 0.010 | 4.1E-58  |
| rs1758632  | C | G | -0.049 | 0.008 | 1.4E-09  |
| rs17791483 | G | A | -0.102 | 0.015 | 3.4E-12  |
| rs2796441  | A | G | -0.072 | 0.007 | 2.0E-22  |
| rs10114341 | C | T | -0.041 | 0.007 | 1.2E-08  |
| rs687621   | G | A | 0.043  | 0.008 | 1.4E-08  |
| rs11257655 | T | C | 0.074  | 0.009 | 2.0E-17  |
| rs2616132  | A | G | 0.046  | 0.008 | 6.6E-09  |
| rs2633310  | T | G | -0.044 | 0.008 | 2.4E-08  |
| rs753270   | T | C | -0.053 | 0.008 | 2.7E-11  |
| rs7923866  | T | C | -0.097 | 0.007 | 9.3E-40  |
| rs11591741 | C | G | -0.048 | 0.008 | 1.2E-09  |
| rs7903146  | T | C | 0.306  | 0.008 | 1.0E-200 |
| rs4918796  | C | T | 0.062  | 0.009 | 4.0E-13  |
| rs2421016  | T | C | -0.046 | 0.007 | 1.5E-10  |
| rs2237892  | T | C | -0.096 | 0.016 | 8.7E-10  |
| rs5215     | C | T | 0.068  | 0.007 | 2.1E-20  |
| rs7929543  | C | A | 0.083  | 0.014 | 2.2E-09  |
| rs1552224  | C | A | -0.103 | 0.010 | 8.6E-25  |
| rs10830963 | G | C | 0.091  | 0.008 | 5.8E-30  |
| rs7931302  | C | A | 0.046  | 0.008 | 7.7E-09  |
| rs67232546 | T | C | 0.060  | 0.010 | 4.7E-10  |
| rs11048456 | C | T | 0.049  | 0.008 | 3.0E-09  |
| rs10842994 | T | C | -0.076 | 0.009 | 1.0E-16  |
| rs2261181  | T | C | 0.099  | 0.012 | 9.2E-17  |
| rs1480474  | G | A | 0.041  | 0.007 | 1.7E-08  |
| rs7138300  | C | T | 0.044  | 0.007 | 5.6E-10  |

SUPPLEMENTARY DATA

|            |   |   |        |       |         |
|------------|---|---|--------|-------|---------|
| rs11107116 | T | G | 0.047  | 0.009 | 3.8E-08 |
| rs61953351 | T | G | -0.070 | 0.009 | 2.0E-14 |
| rs940904   | G | A | -0.050 | 0.008 | 2.1E-09 |
| rs825476   | C | T | -0.052 | 0.007 | 6.8E-13 |
| rs576674   | G | A | 0.065  | 0.010 | 1.8E-11 |
| rs963740   | T | A | -0.048 | 0.009 | 2.2E-08 |
| rs1359790  | A | G | -0.080 | 0.008 | 2.8E-23 |
| rs7144011  | T | G | 0.048  | 0.009 | 1.6E-08 |
| rs4502156  | C | T | -0.041 | 0.007 | 1.7E-08 |
| rs982077   | A | G | 0.045  | 0.007 | 2.6E-10 |
| rs7177055  | G | A | -0.065 | 0.008 | 2.7E-16 |
| rs4932143  | G | C | 0.057  | 0.009 | 5.5E-11 |
| rs12910825 | G | A | 0.052  | 0.007 | 2.2E-12 |
| rs9940149  | A | G | -0.058 | 0.010 | 9.3E-10 |
| rs7185735  | G | A | 0.106  | 0.007 | 1.6E-47 |
| rs244415   | A | G | -0.047 | 0.008 | 3.9E-09 |
| rs77258096 | A | C | -0.117 | 0.013 | 1.8E-18 |
| rs2925979  | T | C | 0.053  | 0.008 | 9.1E-12 |
| rs8068804  | A | G | 0.059  | 0.008 | 4.4E-14 |
| rs12945601 | T | C | 0.048  | 0.008 | 1.7E-09 |
| rs17405722 | A | G | 0.087  | 0.015 | 2.3E-09 |
| rs9911983  | C | T | -0.040 | 0.007 | 4.8E-08 |
| rs9894220  | G | A | -0.059 | 0.008 | 1.5E-13 |
| rs302864   | A | G | 0.071  | 0.013 | 2.5E-08 |
| rs17631783 | T | C | -0.049 | 0.009 | 3.9E-08 |
| rs7240767  | C | T | 0.045  | 0.008 | 2.2E-08 |
| rs12970134 | A | G | 0.056  | 0.008 | 5.3E-12 |
| rs10401969 | C | T | 0.092  | 0.013 | 4.1E-12 |
| rs8108269  | G | T | 0.064  | 0.008 | 3.1E-16 |
| rs6515236  | C | A | -0.050 | 0.009 | 3.3E-08 |
| rs6059662  | A | G | -0.045 | 0.008 | 1.5E-08 |
| rs4810426  | T | C | 0.073  | 0.013 | 2.1E-08 |
| rs6066138  | A | G | -0.049 | 0.008 | 1.9E-09 |
| rs16988333 | G | A | -0.075 | 0.013 | 9.2E-09 |
| rs4823182  | G | A | 0.048  | 0.008 | 3.4E-10 |

## SUPPLEMENTARY DATA

|            |   |   |        |       |         |
|------------|---|---|--------|-------|---------|
| rs6878122  | G | A | 0.056  | 0.008 | 1.2E-12 |
| rs11651755 | C | T | 0.074  | 0.008 | 9.0E-22 |
| rs12299509 | G | A | 0.047  | 0.007 | 2.1E-10 |
| rs1063355  | T | G | -0.071 | 0.008 | 3.7E-19 |

SNP: single nucleotide polymorphism; SE: standard deviation. Beta and SE expressed as change in log odds ratio of T2D per effect allele.

SUPPLEMENTARY DATA

**Supplementary Table S6.** The associations of individual SNPs (used as genetic instruments for fasting insulin in Mendelian randomization analyses) with fasting insulin

| SNP        | Effect allele | Other allele | Effect allele frequency | Beta     | SE       | P-value  |
|------------|---------------|--------------|-------------------------|----------|----------|----------|
| rs10195252 | C             | T            | 0.44                    | -0.02025 | 0.003291 | 4.87E-10 |
| rs1121980  | G             | A            | 0.48                    | -0.02532 | 0.003165 | 8.36E-16 |
| rs1167800  | A             | G            | 0.45                    | 0.020253 | 0.003291 | 2.61E-09 |
| rs1260326  | C             | T            | 0.42                    | 0.024051 | 0.003291 | 3.84E-14 |
| rs1530559  | A             | G            | 0.40                    | 0.017722 | 0.003291 | 3.37E-08 |
| rs2745353  | T             | C            | 0.45                    | 0.017722 | 0.003165 | 5.48E-09 |
| rs2820436  | C             | A            | 0.32                    | 0.018987 | 0.003291 | 4.36E-09 |
| rs2972143  | G             | A            | 0.37                    | 0.017722 | 0.003291 | 3.15E-08 |
| rs4865796  | A             | G            | 0.29                    | 0.018987 | 0.003291 | 2.09E-08 |
| rs731839   | A             | G            | 0.34                    | -0.01772 | 0.003291 | 1.72E-08 |
| rs7903146  | C             | T            | 0.28                    | 0.022785 | 0.003544 | 6.13E-11 |
| rs860598   | A             | G            | 0.14                    | 0.022785 | 0.004051 | 1.64E-08 |
| rs983309   | G             | T            | 0.10                    | -0.03671 | 0.00481  | 3.81E-14 |
| rs9884482  | T             | C            | 0.35                    | -0.02025 | 0.003038 | 1.40E-11 |

SNP: single nucleotide polymorphism; SE: standard deviation. Beta and SE expressed as change in fasting insulin (in SD log pmol/L) per effect allele.

SUPPLEMENTARY DATA

**Supplementary Table S7a.** Association of liver function markers-related SNPs with continuous potential confounders of the exposure-outcome associations meta-analysed across the relevant UCLEB studies and GIANT consortium data

| SNP/<br>instrument | Potential confounders (Effect size per copy of the liver enzyme raising allele (95% CI)) |                      |                              |                          |                      |                     |                      |                      |
|--------------------|------------------------------------------------------------------------------------------|----------------------|------------------------------|--------------------------|----------------------|---------------------|----------------------|----------------------|
|                    | Age (years)                                                                              | BMI (SD)*            | Waist<br>circumference (SD)* | Waist-hip ratio<br>(SD)* | ALT (SD)             | AST (SD)            | GGT (SD)             | ALP (SD)             |
| rs11597390         | -0.13 (-0.30, 0.03)                                                                      | 0.00 (-0.01, 0.01)   | 0.01 (0.00, 0.02)            | 0.00 (-0.00, 0.01)       | N/A                  | 0.06 (0.03, 0.10)   | 0.03 (-0.00, 0.06)   | -0.08 (-0.13, -0.02) |
| rs2143571          | -0.04 (-0.26, 0.17)                                                                      | 0.00 (-0.01, 0.01)   | 0.00 (-0.01, 0.01)           | 0.00 (-0.01, 0.01)       | N/A                  | 0.12 (0.07, 0.17)   | 0.05 (-0.00, 0.09)   | 0.03 (-0.04, 0.11)   |
| rs2954021          | -0.11 (0.27, 0.05)                                                                       | -0.01 (-0.02, -0.00) | -0.01 (-0.01, 0.00)          | 0.00 (-0.01, 0.01)       | N/A                  | -0.00 (-0.03, 0.03) | 0.03 (-0.01, 0.06)   | 0.08 (0.03, 0.13)    |
| rs6834314          | 0.04 (-0.13, 0.22)                                                                       | -0.01 (-0.02, -0.01) | -0.01 (-0.02, 0.00)          | -0.00 (-0.01, 0.01)      | N/A                  | 0.04 (0.00, 0.08)   | 0.03 (-0.00, 0.07)   | -0.03 (-0.09, 0.03)  |
| ALT<br>instrument  | -0.07 (-0.16, 0.02)                                                                      | -0.00 (-0.01, 0.00)  | -0.00 (-0.00, 0.00)          | 0.00 (-0.00, 0.01)       | N/A                  | 0.05 (0.03, 0.07)   | 0.03 (0.01, 0.05)    | -0.00 (-0.03, 0.03)  |
| rs17109512         | -0.27 (-0.99, 0.39)                                                                      | 0.00 (-0.02, 0.02)   | -0.01 (-0.03, 0.01)          | -0.00 (-0.03, 0.02)      | -0.16 (-0.31, 0.00)  | N/A                 | -0.12 (-0.26, 0.02)  | -0.13 (-0.38, 0.13)  |
| rs738407           | -0.05 (-0.30, 0.21)                                                                      | -0.00 (-0.01, 0.00)  | -0.00 (-0.01, 0.01)          | -0.00 (-0.01, 0.01)      | 0.13 (0.07, 0.19)    | N/A                 | 0.02 (-0.03, 0.07)   | 0.03 (-0.05, 0.12)   |
| rs738408           | -0.04 (-0.27, 0.19)                                                                      | -0.01 (-0.01, 0.00)  | -0.00 (-0.01, 0.01)          | 0.00 (-0.01, 0.01)       | 0.13 (0.07, 0.18)    | N/A                 | 0.01 (-0.03, 0.06)   | 0.02 (-0.05, 0.10)   |
| AST<br>instrument  | -0.06 (-0.22, 0.11)                                                                      | -0.00 (-0.01, 0.00)  | -0.00 (-0.01, 0.00)          | -0.00 (-0.01, 0.01)      | 0.11 (0.07, 0.15)    | N/A                 | 0.01 (-0.03, 0.04)   | 0.02 (-0.04, 0.07)   |
| rs16856332         | 0.13 (-0.41, 0.68)                                                                       | -0.01 (-0.03, 0.00)  | -0.02 (-0.04, 0.00)          | -0.01 (-0.03, 0.02)      | 0.04 (-0.09, 0.17)   | -0.06 (-0.18, 0.06) | -0.11 (-0.23, -0.00) | N/A                  |
| rs174601           | -0.04 (-0.20, 0.12)                                                                      | 0.00 (-0.00, 0.01)   | 0.00 (-0.00, 0.01)           | 0.00 (-0.00, 0.01)       | -0.02 (-0.06, 0.01)  | 0.00 (-0.03, 0.04)  | 0.00 (-0.03, 0.04)   | N/A                  |
| rs1780324          | -0.03 (-0.18, 0.13)                                                                      | -0.00 (-0.01, 0.00)  | -0.00 (-0.01, 0.00)          | -0.00 (-0.01, 0.00)      | -0.01 (-0.05, 0.02)  | -0.01 (-0.04, 0.03) | 0.01 (-0.03, 0.04)   | N/A                  |
| rs2236653          | 0.16 (-0.02, 0.33)                                                                       | -0.00 (-0.01, 0.01)  | -0.00 (-0.01, 0.01)          | -0.00 (-0.01, 0.01)      | -0.00 (-0.04, 0.04)  | -0.00 (-0.04, 0.03) | 0.02 (-0.01, 0.06)   | N/A                  |
| rs281377           | 0.16 (0.00, 0.33)                                                                        | 0.01 (0.00, 0.02)    | 0.01 (0.00, 0.02)            | -0.01 (-0.01, 0.00)      | 0.00 (-0.04, 0.04)   | 0.00 (-0.03, 0.04)  | -0.05 (-0.08, -0.01) | N/A                  |
| rs2954021          | -0.11 (-0.27, 0.05)                                                                      | -0.01 (-0.02, -0.00) | -0.01 (-0.01, 0.00)          | 0.00 (-0.01, 0.01)       | 0.03 (-0.00, 0.07)   | -0.00 (-0.03, 0.03) | 0.03 (-0.01, 0.06)   | N/A                  |
| rs314253           | 0.15 (-0.02, 0.31)                                                                       | -0.000 (-0.01, 0.01) | -0.00 (-0.01, 0.01)          | -0.01 (-0.01, 0.00)      | 0.01 (-0.03, 0.05)   | 0.00 (-0.03, 0.04)  | 0.00 (-0.03, 0.04)   | N/A                  |
| rs514708           | -0.13 (-0.31, 0.05)                                                                      | 0.00 (-0.01, 0.01)   | -0.00 (-0.01, 0.00)          | -0.01 (-0.02, -0.00)     | 0.02 (-0.03, 0.06)   | 0.07 (0.03, 0.11)   | 0.03 (-0.01, 0.06)   | N/A                  |
| rs579459           | -0.12 (-0.32, 0.07)                                                                      | 0.00 (-0.01, 0.01)   | 0.00 (-0.00, 0.01)           | 0.00 (-0.00, 0.01)       | 0.00 (-0.05, 0.05)   | 0.05 (0.01, 0.10)   | -0.05 (-0.09, -0.01) | N/A                  |
| rs6984305          | -0.00 (-0.25, 0.25)                                                                      | 0.00 (-0.01, 0.01)   | 0.01 (-0.00, 0.02)           | 0.01 (0.00, 0.02)        | 0.10 (0.04, 0.16)    | 0.07 (0.01, 0.12)   | -0.06 (-0.11, -0.01) | N/A                  |
| rs7186908          | -0.09 (-0.29, 0.12)                                                                      | -0.00 (-0.01, 0.01)  | -0.01 (-0.02, 0.00)          | -0.00 (-0.01, 0.01)      | -0.01 (-0.06, 0.04)  | -0.00 (-0.05, 0.04) | -0.02 (-0.07, 0.02)  | N/A                  |
| rs7267979          | 0.11 (-0.05, 0.26)                                                                       | -0.01 (-0.01, -0.00) | -0.01 (-0.02, -0.01)         | -0.01 (-0.02, -0.01)     | -0.03 (-0.07, 0.01)  | -0.02 (-0.05, 0.02) | 0.00 (-0.03, 0.03)   | N/A                  |
| rs7923609          | -0.01 (-0.17, 0.15)                                                                      | -0.01 (-0.02, -0.00) | -0.01 (-0.02, -0.00)         | -0.02 (-0.02, -0.01)     | -0.00 (-0.04, 0.03)  | -0.02 (-0.05, 0.01) | -0.00 (-0.03, 0.03)  | N/A                  |
| rs9467160          | 0.19 (0.01, 0.37)                                                                        | -0.01 (-0.02, -0.00) | -0.01 (-0.02, -0.00)         | -0.00 (-0.01, 0.00)      | -0.03 (-0.07, 0.02)  | -0.04 (-0.07, 0.00) | -0.00 (-0.05, 0.02)  | N/A                  |
| ALP<br>instrument  | 0.02 (-0.02, 0.07)                                                                       | -0.00 (-0.00, -0.00) | -0.00 (-0.00, -0.00)         | -0.00 (-0.01, -0.00)     | -0.00 (-0.01, 0.01)  | 0.00 (-0.01, 0.01)  | -0.00 (-0.01, 0.00)  | N/A                  |
| rs10513686         | -0.02 (-0.26, 0.22)                                                                      | 0.01 (0.00, 0.02)    | 0.01 (-0.00, 0.02)           | 0.01 (-0.00, 0.02)       | 0.03 (-0.03, 0.08)   | -0.01 (-0.06, 0.04) | N/A                  | -0.01 (-0.09, 0.07)  |
| rs1076540          | 0.02 (-0.17, 0.22)                                                                       | 0.00 (-0.01, 0.01)   | -0.00 (-0.01, 0.01)          | 0.01 (-0.00, 0.02)       | 0.03 (-0.01, 0.08)   | 0.02 (-0.02, 0.06)  | N/A                  | 0.01 (-0.06, 0.07)   |
| rs10908458         | 0.01 (-0.16, 0.17)                                                                       | 0.01 (-0.00, 0.01)   | -0.00 (-0.01, 0.01)          | -0.01 (-0.01, 0.00)      | 0.01 (-0.02, 0.05)   | 0.01 (-0.02, 0.05)  | N/A                  | -0.01 (-0.06, 0.04)  |
| rs12145922         | -0.04 (-0.20, 0.12)                                                                      | -0.01 (-0.02, -0.00) | 0.00 (-0.01, 0.01)           | 0.01 (-0.00, 0.01)       | -0.02 (-0.06, 0.01)  | -0.01 (-0.04, 0.02) | N/A                  | -0.01 (-0.06, 0.05)  |
| rs1260326          | -0.21 (-0.37, -0.05)                                                                     | -0.01 (-0.02, -0.01) | -0.01 (-0.01, -0.00)         | 0.00 (-0.00, 0.01)       | 0.03 (-0.01, 0.07)   | 0.03 (-0.00, 0.07)  | N/A                  | 0.04 (-0.01, 0.10)   |
| rs12968116         | SNP not in UCLEB                                                                         | 0.00 (-0.01, 0.01)   | 0.00 (-0.01, 0.02)           | 0.01 (-0.01, 0.02)       | SNP not in UCLEB     | SNP not in UCLEB    | N/A                  | SNP not in UCLEB     |
| rs13030978         | -0.07 (-0.33, 0.19)                                                                      | -0.00 (-0.01, 0.01)  | -0.01 (-0.01, 0.00)          | -0.00 (-0.01, 0.01)      | 0.02 (-0.04, 0.08)   | 0.04 (-0.02, 0.09)  | N/A                  | -0.09 (-0.17, -0.00) |
| rs1335645          | SNP not in UCLEB                                                                         | 0.01 (-0.00, 0.02)   | 0.01 (-0.01, 0.02)           | 0.01 (-0.01, 0.02)       | SNP not in UCLEB     | SNP not in UCLEB    | N/A                  | SNP not in UCLEB     |
| rs1497406          | 0.08 (-0.12, 0.27)                                                                       | -0.01 (-0.01, 0.00)  | -0.00 (-0.01, 0.01)          | 0.00 (-0.01, 0.01)       | 0.01 (-0.03, 0.06)   | 0.02 (-0.02, 0.06)  | N/A                  | -0.01 (-0.08, 0.05)  |
| rs17145750         | 0.04 (-0.17, 0.25)                                                                       | -0.01 (-0.02, -0.00) | -0.00 (-0.01, 0.01)          | 0.01 (0.00, 0.02)        | -0.06 (-0.11, -0.01) | -0.04 (-0.09, 0.00) | N/A                  | 0.01 (-0.06, 0.08)   |
| rs2140773          | -0.08 (-0.25, 0.09)                                                                      | 0.00 (-0.00, 0.01)   | 0.00 (-0.01, 0.01)           | 0.01 (-0.00, 0.01)       | -0.00 (-0.04, 0.04)  | -0.02 (-0.05, 0.02) | N/A                  | -0.03 (-0.08, 0.02)  |
| rs2739330          | 0.09 (-0.10, 0.28)                                                                       | -0.00 (-0.01, 0.01)  | -0.00 (-0.01, 0.00)          | 0.00 (-0.01, 0.01)       | -0.02 (-0.06, 0.03)  | -0.00 (-0.04, 0.04) | N/A                  | 0.04 (-0.02, 0.10)   |
| rs339969           | -0.13 (-0.31, 0.06)                                                                      | 0.01 (0.01, 0.02)    | 0.01 (-0.002, 0.02)          | -0.00 (-0.01, 0.01)      | 0.02 (-0.02, 0.06)   | 0.02 (-0.02, 0.06)  | N/A                  | -0.01 (-0.07, 0.05)  |

SUPPLEMENTARY DATA

| SNP/<br>instrument | Age (years)          | BMI (SD)*            | Potential confounders (Effect size per copy of the liver enzyme raising allele (95% CI)) |                          |                     |                     |          | GGT (SD)             | ALP (SD) |
|--------------------|----------------------|----------------------|------------------------------------------------------------------------------------------|--------------------------|---------------------|---------------------|----------|----------------------|----------|
|                    |                      |                      | Waist<br>circumference (SD)*                                                             | Waist-hip ratio<br>(SD)* | ALT (SD)            | AST (SD)            |          |                      |          |
| SNP/<br>instrument | Age (years)          | BMI (SD)             | Waist<br>circumference (SD)                                                              | Waist-hip ratio (SD)     | ALT (SD)            | AST (SD)            | GGT (SD) | ALP (SD)             |          |
| rs4074793          | -0.04 (-0.34, 0.26)  | 0.00 (-0.01, 0.02)   | 0.01 (-0.01, 0.02)                                                                       | 0.00 (-0.01, 0.02)       | 0.07 (-0.00, 0.14)  | 0.04 (-0.03, 0.10)  | N/A      | 0.11 (0.01, 0.21)    |          |
| rs4503880          | SNP not in UCLEB     | -0.00 (-0.01, 0.01)  | -0.00 (-0.02, 0.01)                                                                      | -0.00 (-0.02, 0.01)      | SNP not in UCLEB    | SNP not in UCLEB    | N/A      | SNP not in UCLEB     |          |
| rs4547811          | 0.12 (-0.13, 0.37)   | 0.00 (-0.01, 0.01)   | 0.00 (-0.01, 0.01)                                                                       | -0.00 (-0.01, 0.01)      | 0.06 (0.00, 0.12)   | 0.04 (-0.01, 0.09)  | N/A      | 0.04 (-0.04, 0.13)   |          |
| rs4581712          | -0.12 (-0.57, 0.32)  | 0.00 (-0.00, 0.01)   | 0.00 (-0.01, 0.01)                                                                       | -0.00 (-0.01, 0.01)      | 0.02 (-0.07, 0.11)  | -0.00 (-0.10, 0.09) | N/A      | 0.03 (-0.11, 0.18)   |          |
| rs4820599          | -0.09 (-0.27, 0.08)  | -0.003 (-0.01, 0.00) | -0.00 (-0.01, 0.00)                                                                      | -0.00 (-0.01, 0.00)      | -0.03 (-0.07, 0.01) | -0.02 (-0.06, 0.02) | N/A      | -0.00 (-0.06, 0.06)  |          |
| rs516246           | -0.16 (-0.31, -0.00) | -0.01 (-0.01, -0.00) | -0.01 (-0.01, 0.00)                                                                      | 0.01 (-0.02, 0.01)       | -0.00 (-0.04, 0.04) | 0.00 (-0.03, 0.04)  | N/A      | -0.06 (-0.11, -0.01) |          |
| rs6888304          | SNP not in UCLEB     | -0.01 (-0.01, 0.00)  | -0.01 (-0.02, 0.00)                                                                      | -0.01 (-0.02, 0.00)      | SNP not in UCLEB    | SNP not in UCLEB    | N/A      | SNP not in UCLEB     |          |
| rs7310409          | 0.00 (-0.16, 0.17)   | 0.00 (-0.00, 0.01)   | 0.00 (-0.00, 0.01)                                                                       | 0.01 (0.00, 0.01)        | -0.01 (-0.04, 0.03) | -0.00 (-0.03, 0.03) | N/A      | -0.07 (-0.13, -0.02) |          |
| rs754466           | SNP not in UCLEB     | -0.00 (-0.01, 0.01)  | -0.00 (-0.01, 0.05)                                                                      | 0.00 (-0.01, 0.01)       | SNP not in UCLEB    | SNP not in UCLEB    | N/A      | SNP not in UCLEB     |          |
| rs8038465          | 0.11 (-0.12, 0.34)   | -0.00 (-0.01, 0.01)  | -0.01 (-0.01, 0.00)                                                                      | -0.00 (-0.01, 0.01)      | 0.06 (0.00, 0.11)   | 0.03 (-0.02, 0.08)  | N/A      | -0.03 (-0.11, 0.04)  |          |
| rs9296736          | 0.09 (-0.08, 0.26)   | 0.01 (0.00, 0.01)    | 0.01 (-0.00, 0.01)                                                                       | 0.00 (-0.01, 0.01)       | 0.03 (-0.01, 0.07)  | -0.01 (-0.04, 0.03) | N/A      | -0.00 (-0.06, 0.05)  |          |
| rs944002           | -0.24 (-0.42, -0.06) | -0.00 (-0.01, 0.01)  | -0.00 (-0.02, 0.01)                                                                      | -0.00 (-0.01, 0.01)      | -0.01 (-0.05, 0.04) | -0.01 (-0.05, 0.03) | N/A      | -0.01 (-0.07, 0.05)  |          |
| rs9913711          | SNP not in UCLEB     | -0.00 (-0.01, 0.01)  | -0.01 (-0.01, 0.00)                                                                      | -0.01 (-0.02, 0.00)      | SNP not in UCLEB    | SNP not in UCLEB    | N/A      | SNP not in UCLEB     |          |
| GGT<br>instrument  | -0.04 (-0.08, 0.00)  | -0.00 (-0.00, 0.00)  | -0.00 (-0.00, 0.00)                                                                      | 0.00 (-0.00, 0.00)       | 0.00 (-0.00, 0.02)  | 0.00 (-0.00, 0.01)  | N/A      | -0.01 (-0.02, 0.00)  |          |

ALP: alkaline phosphatase; ALT: alanine aminotransferase; AST: aspartate aminotransferase; GGT: gamma-glutamyl transferase; BMI: body mass index; N/A: not applicable; SD: standard deviation; SNPs: single nucleotide polymorphisms. GIANT: The Genetic Investigation of Anthropometric Traits.

\*Summary-level data publicly available from the GIANT consortium was used for these traits in addition to the data from the relevant UCLEB studies.



SUPPLEMENTARY DATA

**Supplementary Table S7b.** Association of liver function markers-related SNPs with potentially confounding dichotomous traits meta-analysed across the relevant UCLEB studies.

| SNP/ instrument       | Potential confounders (Odds ratio per copy of the liver function marker raising allele (95% CI)) |                   |                     |                   |
|-----------------------|--------------------------------------------------------------------------------------------------|-------------------|---------------------|-------------------|
|                       | Sex                                                                                              | Smoking           | Alcohol consumption | Social class      |
| <b>rs11597390</b>     | 0.98 (0.91, 1.06)                                                                                | 0.97 (0.92, 1.02) | 1.08 (0.98, 1.18)   | 1.06 (1.00, 1.14) |
| <b>rs2143571</b>      | 0.99 (0.89, 1.09)                                                                                | 1.01 (0.93, 1.09) | 1.09 (0.96, 1.25)   | 1.08 (0.99, 1.18) |
| <b>rs2954021</b>      | 0.98 (0.91, 1.05)                                                                                | 1.03 (0.98, 1.09) | 1.00 (0.92, 1.10)   | 1.00 (0.94, 1.06) |
| <b>rs6834314</b>      | 0.99 (0.92, 1.07)                                                                                | 0.99 (0.93, 1.05) | 0.95 (0.86, 1.06)   | 1.01 (0.94, 1.08) |
| <b>ALT instrument</b> | 0.98 (0.95, 1.02)                                                                                | 1.00 (0.97, 1.03) | 1.02 (0.97, 1.08)   | 1.03 (1.00, 1.07) |
| <b>rs17109512</b>     | 1.09 (0.79, 1.52)                                                                                | 0.87 (0.68, 1.11) | 1.37 (0.94, 1.99)   | 0.83 (0.63, 1.10) |
| <b>rs738407</b>       | 1.07 (0.95, 1.20)                                                                                | 1.00 (0.92, 1.10) | 1.01 (0.87, 1.17)   | 1.02 (0.92, 1.13) |
| <b>rs738408</b>       | 1.01 (0.92, 1.12)                                                                                | 0.99 (0.91, 1.07) | 1.03 (0.90, 1.17)   | 1.06 (0.97, 1.16) |
| <b>AST instrument</b> | 1.04 (0.97, 1.12)                                                                                | 0.99 (0.93, 1.05) | 1.04 (0.95, 1.14)   | 1.03 (0.96, 1.10) |
| <b>rs10819937</b>     | SNP not in UCLEB                                                                                 | SNP not in UCLEB  | SNP not in UCLEB    | SNP not in UCLEB  |
| <b>rs16856332</b>     | 0.99 (0.76, 1.29)                                                                                | 0.95 (0.78, 1.15) | 1.07 (0.78, 1.47)   | 1.07 (0.85, 1.33) |
| <b>rs174601</b>       | 1.03 (0.96, 1.11)                                                                                | 0.98 (0.93, 1.04) | 0.95 (0.86, 1.04)   | 1.00 (0.94, 1.07) |
| <b>rs1780324</b>      | 0.97 (0.90, 1.04)                                                                                | 0.93 (0.88, 0.99) | 0.97 (0.89, 1.07)   | 1.04 (0.98, 1.11) |
| <b>rs2236653</b>      | 0.90 (0.84, 0.98)                                                                                | 0.98 (0.92, 1.04) | 0.95 (0.86, 1.04)   | 0.98 (0.91, 1.05) |
| <b>rs281377</b>       | 1.06 (0.99, 1.14)                                                                                | 0.95 (0.90, 1.00) | 0.96 (0.87, 1.05)   | 1.04 (0.98, 1.11) |
| <b>rs2954021</b>      | 0.98 (0.91, 1.05)                                                                                | 1.03 (0.98, 1.09) | 1.00 (0.92, 1.10)   | 1.00 (0.94, 1.06) |
| <b>rs314253</b>       | 0.96 (0.90, 1.04)                                                                                | 0.99 (0.93, 1.04) | 1.04 (0.95, 1.15)   | 1.01 (0.94, 1.07) |
| <b>rs514708</b>       | 0.98 (0.90, 1.06)                                                                                | 0.96 (0.91, 1.02) | 1.09 (0.98, 1.21)   | 1.03 (0.95, 1.10) |
| <b>rs579459</b>       | 1.01 (0.93, 1.11)                                                                                | 0.99 (0.92, 1.06) | 1.03 (0.92, 1.15)   | 1.05 (0.97, 1.13) |
| <b>rs6984305</b>      | 1.03 (0.92, 1.16)                                                                                | 0.97 (0.89, 1.05) | 1.04 (0.90, 1.21)   | 1.03 (0.93, 1.14) |
| <b>rs7186908</b>      | 1.05 (0.95, 1.15)                                                                                | 1.05 (0.98, 1.12) | 1.02 (0.91, 1.15)   | 1.06 (0.98, 1.15) |
| <b>rs7267979</b>      | 1.05 (0.97, 1.12)                                                                                | 1.01 (0.96, 1.07) | 1.01 (0.92, 1.10)   | 1.03 (0.96, 1.09) |
| <b>rs7923609</b>      | 1.00 (0.93, 1.08)                                                                                | 1.05 (0.99, 1.11) | 1.01 (0.92, 1.11)   | 1.04 (0.97, 1.11) |
| <b>rs9467160</b>      | 0.99 (0.91, 1.07)                                                                                | 0.98 (0.92, 1.04) | 1.01 (0.91, 1.12)   | 1.05 (0.98, 1.13) |
| <b>ALP instrument</b> | 1.00 (0.98, 1.02)                                                                                | 0.99 (0.97, 1.01) | 1.00 (0.98, 1.03)   | 1.03 (1.01, 1.05) |
| <b>rs10513686</b>     | 0.93 (0.84, 1.04)                                                                                | 0.98 (0.90, 1.06) | 0.99 (0.86, 1.14)   | 0.99 (0.90, 1.09) |
| <b>rs1076540</b>      | 0.93 (0.86, 1.02)                                                                                | 1.02 (0.96, 1.09) | 1.08 (0.97, 1.20)   | 0.96 (0.88, 1.03) |
| <b>rs10908458</b>     | 0.96 (0.89, 1.04)                                                                                | 0.99 (0.94, 1.05) | 1.01 (0.92, 1.02)   | 1.02 (0.96, 1.09) |
| <b>rs12145922</b>     | 1.04 (0.97, 1.12)                                                                                | 0.95 (0.90, 1.01) | 0.97 (0.89, 1.07)   | 1.00 (0.93, 1.06) |
| <b>rs1260326</b>      | 0.98 (0.91, 1.05)                                                                                | 0.98 (0.93, 1.04) | 0.91(0.83, 1.00)    | 0.98 (0.92, 1.04) |
| <b>rs12968116</b>     | SNP not in UCLEB                                                                                 | SNP not in UCLEB  | SNP not in UCLEB    | SNP not in UCLEB  |
| <b>rs13030978</b>     | 0.92 (0.82, 1.04)                                                                                | 1.08 (0.99, 1.19) | 0.87 (0.75, 1.01)   | 0.94 (0.84, 1.04) |
| <b>rs1335645</b>      | SNP not in UCLEB                                                                                 | SNP not in UCLEB  | SNP not in UCLEB    | SNP not in UCLEB  |
| <b>rs1497406</b>      | 1.04 (0.95, 1.14)                                                                                | 1.01 (0.94, 1.08) | 0.96 (0.85, 1.07)   | 1.01 (0.94, 1.10) |
| <b>rs17145750</b>     | 1.00 (0.91, 1.10)                                                                                | 0.97 (0.90, 1.04) | 0.89 (0.78, 1.01)   | 0.98 (0.90, 1.06) |

SUPPLEMENTARY DATA

|                       |                   |                   |                   |                   |
|-----------------------|-------------------|-------------------|-------------------|-------------------|
| <b>rs2140773</b>      | 1.05 (0.97, 1.13) | 0.96 (0.91, 1.02) | 1.01 (0.92, 1.11) | 1.05 (0.98, 1.12) |
| <b>rs2739330</b>      | 1.08 (0.99, 1.18) | 1.01 (0.94, 1.07) | 0.88 (0.78, 0.98) | 0.98 (0.91, 1.06) |
| <b>rs339969</b>       | 0.97 (0.89, 1.05) | 1.03 (0.96, 1.09) | 0.96 (0.86, 1.07) | 1.01 (0.94, 1.09) |
| <b>rs4074793</b>      | 0.94 (0.82, 1.09) | 1.02 (0.92, 1.13) | 1.02 (0.86, 1.22) | 0.90 (0.80, 1.02) |
| <b>rs4503880</b>      | SNP not in UCLEB  |
| <b>rs4547811</b>      | 1.06 (0.94, 1.19) | 0.96 (0.88, 1.05) | 0.97 (0.84, 1.12) | 1.03 (0.93, 1.14) |
| <b>rs4581712</b>      | 0.91 (0.78, 1.07) | 1.02 (0.89, 1.17) | 1.12 (0.88, 1.44) | 0.89 (0.76, 1.05) |
| <b>rs4820599</b>      | 0.97 (0.89, 1.05) | 1.03 (0.97, 1.09) | 1.00 (0.91, 1.11) | 1.01 (0.94, 1.08) |
| <b>rs516246</b>       | 0.95 (0.88, 1.02) | 1.05 (0.99, 1.11) | 1.06 (0.97, 1.16) | 0.96 (0.90, 1.02) |
| <b>rs6888304</b>      | SNP not in UCLEB  |
| <b>rs7310409</b>      | 0.97 (0.90, 1.04) | 0.97 (0.92, 1.03) | 1.04 (0.95, 1.14) | 1.05 (0.98, 1.12) |
| <b>rs754466</b>       | SNP not in UCLEB  |
| <b>rs8038465</b>      | 0.97 (0.88, 1.08) | 1.02 (0.94, 1.10) | 1.08 (0.95, 1.24) | 1.03 (0.93, 1.13) |
| <b>rs9296736</b>      | 1.04 (0.96, 1.13) | 0.98 (0.92, 1.04) | 0.95 (0.86, 1.04) | 1.05 (0.98, 1.12) |
| <b>rs944002</b>       | 0.98 (0.90, 1.07) | 1.05 (0.99, 1.12) | 1.04 (0.94, 1.16) | 1.00 (0.93, 1.08) |
| <b>rs9913711</b>      | SNP not in UCLEB  |
| <b>GGT instrument</b> | 0.99 (0.97, 1.01) | 1.00 (0.99, 1.02) | 0.99 (0.96, 1.01) | 1.00 (0.98, 1.02) |

ALP: alkaline phosphatase; ALT: alanine aminotransferase; AST: aspartate aminotransferase; GGT: gamma-glutamyl transferase; SNPs: single nucleotide polymorphisms; UCLEB consortium: UCL-LSHTM-Edinburgh-Bristol consortium

SUPPLEMENTARY DATA

**Supplementary Table S8.** Fully adjusted multivariable regression and Mendelian Randomization associations / effects of liver function markers with continuous outcomes meta-analysed across UCLEB, Fenland\* and GWAS studies

|                    | Mean difference (in S.D units) for each continuous outcome per one S.D increase in each liver function marker (95% CI) |                           |                      |                      |                               |                           |
|--------------------|------------------------------------------------------------------------------------------------------------------------|---------------------------|----------------------|----------------------|-------------------------------|---------------------------|
|                    | Glucose<br>(mmol/L)                                                                                                    | Insulin<br>( $\mu$ IU/ml) | HDL-C<br>(mmol/L)    | LDL-C<br>(mmol/L)    | Total cholesterol<br>(mmol/L) | Triglycerides<br>(mmol/L) |
| <b>ALT</b>         |                                                                                                                        |                           |                      |                      |                               |                           |
| Multivariable      | 0.08 (-0.03, 0.19)                                                                                                     | 0.19 (0.11, 0.28)         | -0.01 (-0.04, 0.02)  | 0.03 (-0.03, 0.08)   | 0.06 (0, 0.11)                | 0.1 (0.05, 0.15)          |
| MR-IVW             | -0.01 (-0.09, 0.07)                                                                                                    | -0.01 (-0.09, 0.06)       | -0.09 (-0.35, 0.16)  | 0.08 (-0.33, 0.48)   | 0.05 (-0.39, 0.48)            | 0.07 (-0.45, 0.59)        |
| MR-Egger           | 0.12 (-0.11, 0.34)                                                                                                     | 0.08 (-0.13, 0.29)        | 0.62 (0.16, 1.09)    | -0.75 (-1.54, 0.04)  | -0.8 (-1.7, 0.11)             | -1.07 (-2.16, 0.02)       |
| MR-Weighted median | -0.02 (-0.17, 0.12)                                                                                                    | 0 (-0.08, 0.08)           | -0.09 (-0.25, 0.07)  | -0.1 (-0.2, 0.01)    | -0.11 (-0.21, -0.01)          | -0.06 (-0.16, 0.04)       |
| <b>AST</b>         |                                                                                                                        |                           |                      |                      |                               |                           |
| Multivariable      | 0 (-0.04, 0.04)                                                                                                        | 0.05 (0.01, 0.09)         | 0.06 (0.04, 0.09)    | -0.02 (-0.05, 0.01)  | 0.01 (-0.02, 0.03)            | 0.02 (-0.04, 0.07)        |
| MR-IVW             | -0.01 (-0.07, 0.04)                                                                                                    | 0.01 (-0.04, 0.06)        | -0.09 (-0.15, -0.04) | -0.07 (-0.13, -0.01) | -0.11 (-0.17, -0.04)          | 0.03 (-0.03, 0.08)        |
| MR-Egger           | 0.01 (-0.18, 0.2)                                                                                                      | 0.08 (-0.03, 0.18)        | -0.06 (-0.19, 0.07)  | -0.17 (-0.31, -0.02) | -0.21 (-0.34, -0.07)          | -0.03 (-0.16, 0.09)       |
| MR-Weighted median | -0.01 (-0.06, 0.04)                                                                                                    | 0.01 (-0.04, 0.06)        | -0.09 (-0.15, -0.03) | -0.07 (-0.13, -0.01) | -0.11 (-0.17, -0.04)          | 0.02 (-0.03, 0.08)        |
| <b>ALP</b>         |                                                                                                                        |                           |                      |                      |                               |                           |
| Multivariable      | 0.01 (-0.04, 0.06)                                                                                                     | 0.02 (-0.03, 0.08)        | -0.04 (-0.08, -0.01) | 0.02 (-0.04, 0.07)   | 0.02 (-0.04, 0.07)            | 0.05 (0, 0.1)             |
| MR-IVW             | -0.03 (-0.08, 0.03)                                                                                                    | -0.01 (-0.04, 0.01)       | -0.06 (-0.13, 0.02)  | -0.17 (-0.28, -0.06) | -0.16 (-0.28, -0.04)          | 0.08 (-0.07, 0.24)        |
| MR-Egger           | -0.06 (-0.22, 0.1)                                                                                                     | 0 (-0.05, 0.04)           | -0.07 (-0.35, 0.21)  | -0.27 (-0.46, -0.07) | -0.25 (-0.45, -0.05)          | 0.03 (-0.28, 0.34)        |
| MR-Weighted median | -0.03 (-0.06, 0)                                                                                                       | -0.01 (-0.04, 0.02)       | -0.03 (-0.12, 0.06)  | -0.2 (-0.34, -0.06)  | -0.19 (-0.31, -0.08)          | 0.03 (-0.05, 0.12)        |
| <b>GGT</b>         |                                                                                                                        |                           |                      |                      |                               |                           |
| Multivariable      | 0.07 (0.02, 0.11)                                                                                                      | 0.1 (0.04, 0.16)          | 0.04 (0.01, 0.07)    | 0.05 (0, 0.1)        | 0.11 (0.06, 0.16)             | 0.15 (0.1, 0.2)           |
| MR-IVW             | -0.05 (-0.12, 0.03)                                                                                                    | -0.02 (-0.07, 0.02)       | -0.04 (-0.08, 0)     | -0.03 (-0.1, 0.03)   | 0.02 (-0.07, 0.11)            | 0.16 (0.02, 0.3)          |
| MR-Egger           | 0.07 (-0.11, 0.24)                                                                                                     | 0.1 (-0.01, 0.22)         | -0.07 (-0.17, 0.03)  | -0.11 (-0.38, 0.16)  | -0.17 (-0.37, 0.02)           | -0.14 (-0.44, 0.17)       |
| MR-Weighted median | 0 (-0.11, 0.11)                                                                                                        | -0.01 (-0.05, 0.03)       | -0.03 (-0.07, 0.01)  | -0.06 (-0.15, 0.03)  | -0.04 (-0.11, 0.04)           | 0 (-0.04, 0.04)           |

\*Fenland study was only included in the instrumental variables analyses of the associations between the exposures ALT, ALP, GGT and lipid outcomes. IVW: inverse-variance weighted method. ALP: alkaline phosphatase; ALT: alanine aminotransferase; AST: aspartate aminotransferase; GGT: gamma-glutamyl transferase; UCLEB consortium: UCL-LSHTM-Edinburgh-Bristol consortium; GWAS: Genome-wide association study; MR: Mendelian randomization; IVW: Inverse variance weighted estimator; S.D: standard deviation; HDL-C: high density lipoprotein-cholesterol; LDL-C: low density lipoprotein-cholesterol

SUPPLEMENTARY DATA

**Supplementary Table S9.** MR-Egger intercept values (pooled across UCLEB, Fenland and GWAS studies)

| Liver function marker | Mean difference (S.D) of each continuous outcome per one S.D increase in the liver function marker (95% CI) |                        |                      |                    |                            |                        |
|-----------------------|-------------------------------------------------------------------------------------------------------------|------------------------|----------------------|--------------------|----------------------------|------------------------|
|                       | Glucose (mmol/L)                                                                                            | Insulin ( $\mu$ IU/ml) | HDL-C (mmol/L)       | LDL-C (mmol/L)     | Total cholesterol (mmol/L) | Triglycerides (mmol/L) |
| <b>ALT</b>            |                                                                                                             |                        |                      |                    |                            |                        |
| MR-Egger intercept    | -0.01 (-0.02, 0.01)                                                                                         | 0 (-0.01, 0.01)        | -0.04 (-0.06, -0.01) | 0.05 (0.02, 0.09)  | 0.06 (0.02, 0.1)           | 0.06 (0.01, 0.12)      |
| <b>AST</b>            |                                                                                                             |                        |                      |                    |                            |                        |
| MR-Egger intercept    | 0.03 (-0.01, 0.07)                                                                                          | 0.01 (-0.02, 0.04)     | 0 (-0.02, 0.03)      | 0.01 (-0.05, 0.07) | 0.01 (-0.06, 0.08)         | 0.01 (-0.02, 0.03)     |
| <b>ALP</b>            |                                                                                                             |                        |                      |                    |                            |                        |
| MR-Egger intercept    | 0.01 (-0.01, 0.02)                                                                                          | 0 (-0.01, 0.01)        | 0 (-0.03, 0.02)      | 0.01 (-0.01, 0.02) | 0.01 (-0.01, 0.02)         | 0.01 (-0.01, 0.02)     |
| <b>GGT</b>            |                                                                                                             |                        |                      |                    |                            |                        |
| MR-Egger intercept    | -0.01 (-0.03, 0)                                                                                            | -0.01 (-0.02, 0)       | 0 (-0.01, 0.01)      | 0.01 (-0.02, 0.03) | 0.01 (0, 0.03)             | 0.02 (0, 0.04)         |

ALP: alkaline phosphatase; ALT: alanine aminotransferase; AST: aspartate aminotransferase; GGT: gamma-glutamyl transferase; HDL-C: high density lipoprotein-cholesterol; LDL-C: low density lipoprotein-cholesterol; UCLEB consortium: UCL-LSHTM-Edinburgh-Bristol consortium; GWAS: Genome-wide association study; MR: Mendelian randomization; IVW: Inverse variance weighted estimator; S.D: standard deviation

## SUPPLEMENTARY DATA

### References

1. Wadsworth M, Kuh D, Richards M, Hardy R. Cohort Profile: The 1946 National Birth Cohort (MRC National Survey of Health and Development). *Int J Epidemiol.* 2006;35(1):49-54.
2. Rantakallio P. The longitudinal study of the northern Finland birth cohort of 1966. *Paediatr Perinat Epidemiol.* 1988;2(1):59-88.
